# Supplementary material
Source: PubMed Central journal article supplement (PMC5591029)
Supplement: mmc1.pdf [file mmc1.pdf]

**The American Journal of Human Genetics, Volume 101**

## **Supplemental Data**

**Spatial Clustering of de Novo Missense**

**Mutations Identifies Candidate**

**Neurodevelopmental Disorder-Associated Genes**

**Stefan H. Lelieveld, Laurens Wiel, Hanka Venselaar, Rolph Pfundt, Gerrit Vriend, Joris A. Veltman, Han G. Brunner, Lisenka E.L.M. Vissers, and Christian Gilissen**

## Supplemental Figures

### *de novo missense variants for ACTL6B*

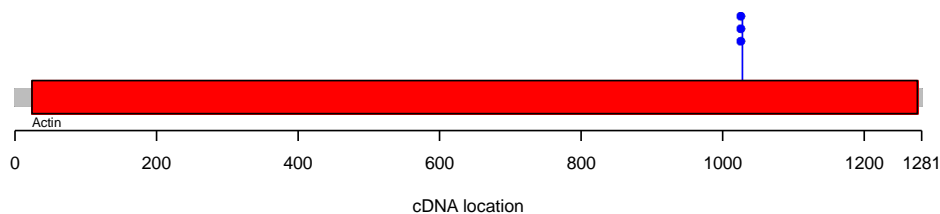

**Figure S1 Schematic representation of *ACTL6B* (ENST00000160382).** The locations of the missense de novo variants are indicated by blue pins. Recurrent de novo missense mutations are indicated by stacked blue pins. Protein domains are annotated based on Pfam HMM search<sup>1</sup> and are illustrated by colored squares.

### *de novo missense variants for ALG13*

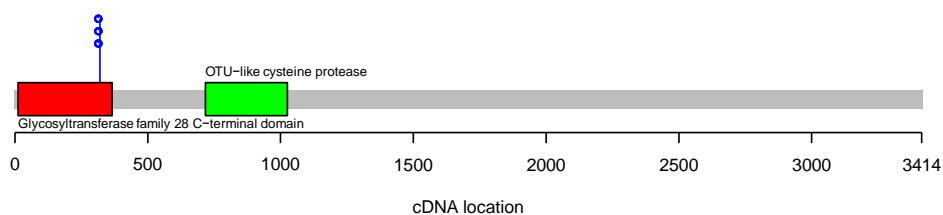

**Figure S2 Schematic representation of *ALG13* (ENST00000394780).** The locations of the missense de novo variants are indicated by blue pins. Recurrent de novo missense mutations are indicated by stacked blue pins. Protein domains are annotated based on Pfam HMM search<sup>1</sup> and are illustrated by colored squares.

***de novo missense variants for CDK13***

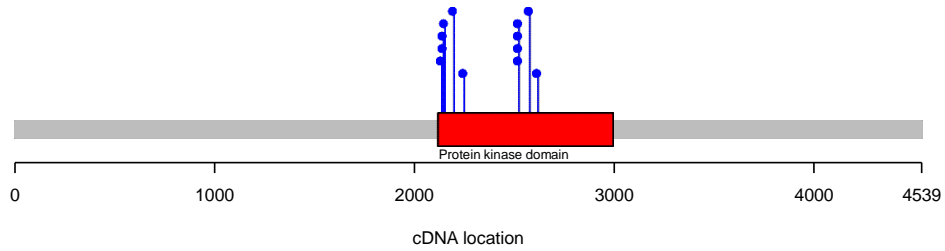

**Figure S3 Schematic representation of *CDK13* (ENST00000181839).** The locations of the missense de novo variants are indicated by blue pins. Recurrent de novo missense mutations are indicated by stacked blue pins. Protein domains are annotated based on Pfam HMM search<sup>1</sup> and are illustrated by colored squares.

***de novo missense variants for COL4A3BP***

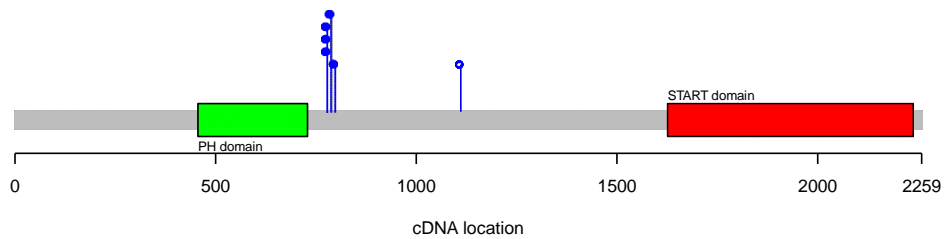

**Figure S4 Schematic representation of *COL4A3BP* (ENST00000380494).** The locations of the missense de novo variants are indicated by blue pins. Recurrent de novo missense mutations are indicated by stacked blue pins. Protein domains are annotated based on Pfam HMM search<sup>1</sup> and are illustrated by colored squares.

**de novo missense variants for GABBR2**

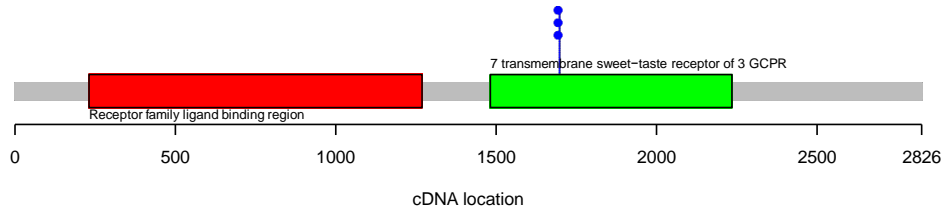

**Figure S5 Schematic representation of *GABBR2* (ENST00000259455).** The locations of the missense de novo variants are indicated by blue pins. Recurrent de novo missense mutations are indicated by stacked blue pins. Protein domains are annotated based on Pfam HMM search<sup>1</sup> and are illustrated by colored squares.

**de novo missense variants for GRIN2B**

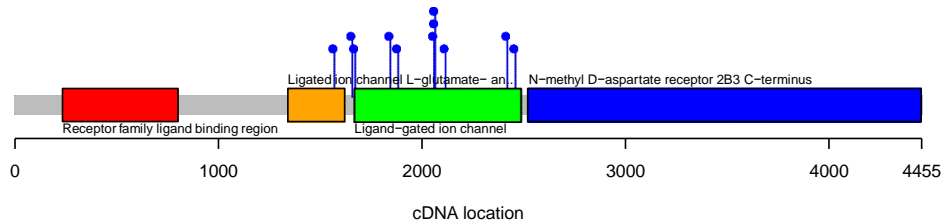

**Figure S6 Schematic representation of *GRIN2B* (ENST00000609686).** The locations of the missense de novo variants are indicated by blue pins. Recurrent de novo missense mutations are indicated by stacked blue pins. Protein domains are annotated based on Pfam HMM search<sup>1</sup> and are illustrated by colored squares.

**de novo missense variants for KCNH1**

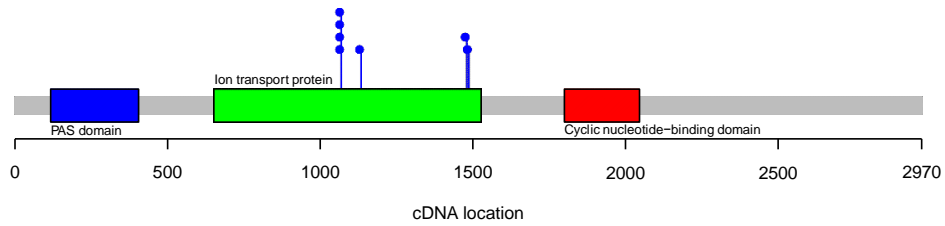

**Figure S7 Schematic representation of *KCNH1* (ENST00000271751).** The locations of the missense de novo variants are indicated by blue pins. Recurrent de novo missense mutations are indicated by stacked blue pins. Protein domains are annotated based on Pfam HMM search<sup>1</sup> and are illustrated by colored squares.

**de novo missense variants for KCNQ2**

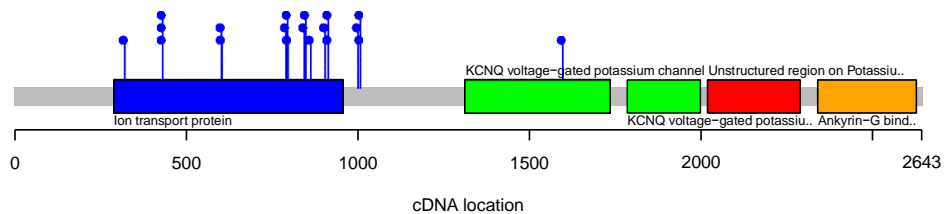

**Figure S8 Schematic representation of *KCNQ2* (ENST00000354587).** The locations of the missense de novo variants are indicated by blue pins. Recurrent de novo missense mutations are indicated by stacked blue pins. Protein domains are annotated based on Pfam HMM search<sup>1</sup> and are illustrated by colored squares.

**de novo missense variants for KIF5C**

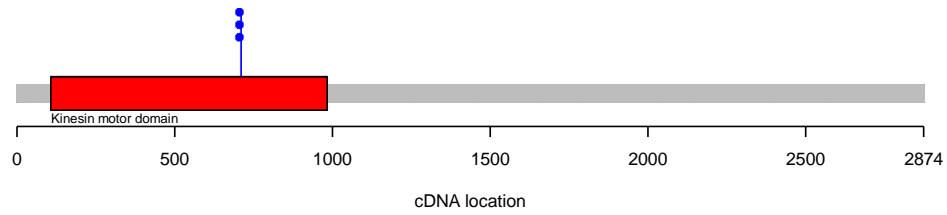

**Figure S9 Schematic representation of *KIF5C* (ENST00000435030).** The locations of the missense de novo variants are indicated by blue pins. Recurrent de novo missense mutations are indicated by stacked blue pins. Protein domains are annotated based on Pfam HMM search<sup>1</sup> and are illustrated by colored squares.

**de novo missense variants for PACS1**

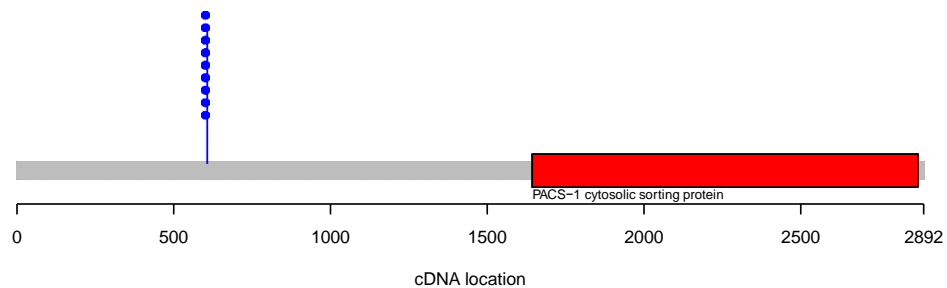

**Figure S10 Schematic representation of *PACS1* (ENST00000320580).** The locations of the missense de novo variants are indicated by blue pins. Recurrent de novo missense mutations are indicated by stacked blue pins. Protein domains are annotated based on Pfam HMM search<sup>1</sup> and are illustrated by colored squares.

**de novo missense variants for PACS2**

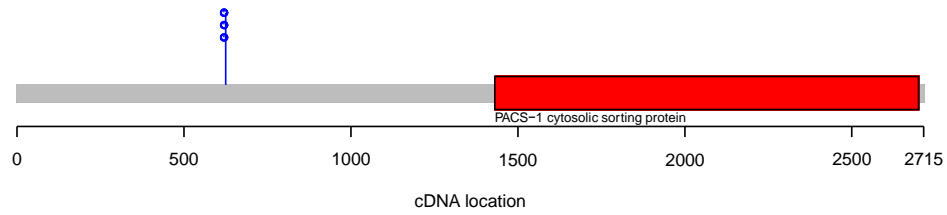

**Figure S11 Schematic representation of *PACS2* (ENST00000458164).** The locations of the missense de novo variants are indicated by blue pins. Recurrent de novo missense mutations are indicated by stacked blue pins. Protein domains are annotated based on Pfam HMM search<sup>1</sup> and are illustrated by colored squares.

**de novo missense variants for PCGF2**

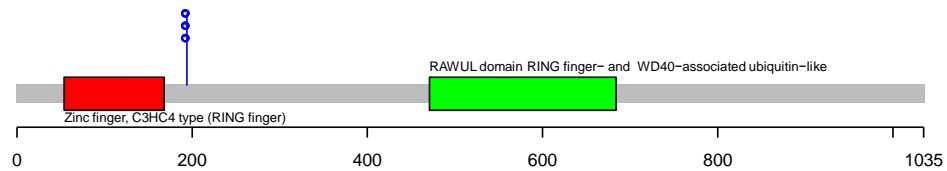

**Figure S12 Schematic representation of *PCGF2* (ENST00000360797).** The locations of the missense de novo variants are indicated by blue pins. Recurrent de novo missense mutations are indicated by stacked blue pins. Protein domains are annotated based on Pfam HMM search<sup>1</sup> and are illustrated by colored squares.

**de novo missense variants for PPP2R1A**

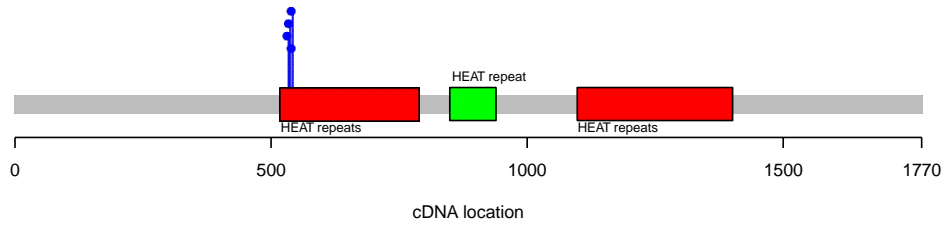

**Figure S13 Schematic representation of PPP2R1A (ENST00000322088).** The locations of the missense de novo variants are indicated by blue pins. Recurrent de novo missense mutations are indicated by stacked blue pins. Protein domains are annotated based on Pfam HMM search<sup>1</sup> and are illustrated by colored squares.

**de novo missense variants for PPP2R5D**

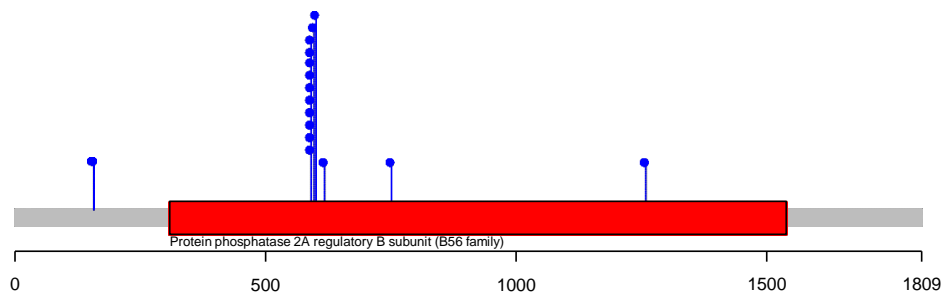

**Figure S14 Schematic representation of PPP2R5D (ENST00000485511).** The locations of the missense de novo variants are indicated by blue pins. Recurrent de novo missense mutations are indicated by stacked blue pins. Protein domains are annotated based on Pfam HMM search<sup>1</sup> and are illustrated by colored squares.



***de novo missense variants for SMAD4***

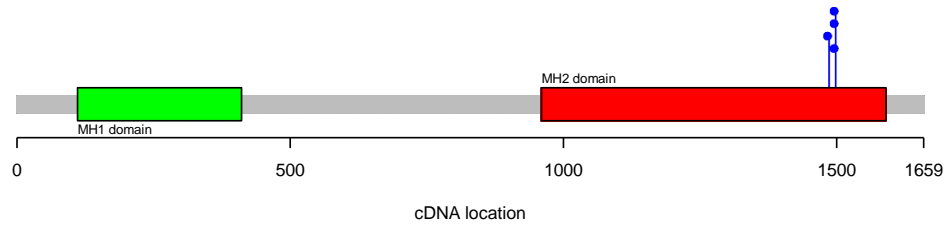

**Figure S15 Schematic representation of *SMAD4* (ENST00000398417).** The locations of the missense de novo variants are indicated by blue pins. Recurrent de novo missense mutations are indicated by stacked blue pins. Protein domains are annotated based on Pfam HMM search<sup>1</sup> and are illustrated by colored squares.

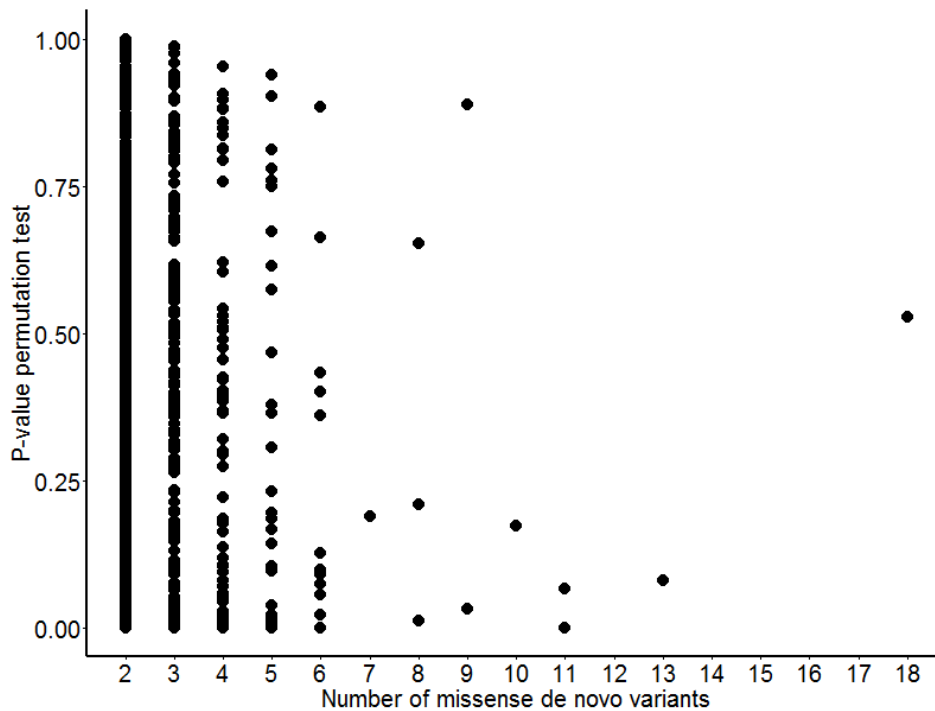

**Figure S16. number of missense variants and the extend of clustering.** We have studied the possibility of a correlation between the number of missense variants and the extend of clustering. Hereto, we have analysed a much larger set of 6,154 de novo missense variants from various patient cohorts present in the denovo-db version 1.3<sup>2</sup> (other than the five selected ID/DD cohorts presented in this manuscript). The variants were filtered as described in Table S1. Correlation analysis (Kendall rank correlation coefficient) between the number of de novo missense variants per gene (x-axis) and the corresponding p-values based on the spatial clustering signal (y-axis) yielded a correlation coefficient of -0.04 indicating there is no correlation.

## Supplemental Tables

| Column name                                                                           | Number of variants remaining |             |
|---------------------------------------------------------------------------------------|------------------------------|-------------|
|                                                                                       | ID and DD set                | Control set |
| Unfiltered                                                                            | 9,770                        | 35,632      |
| Variants in coding regions<br>and canonical splice-sites ( $\pm 2$<br>bp)             | 9,202                        | 2,749       |
| ExAC number of<br>heterozygous variants less<br>than 2 and no homozygous<br>variants. | 6,495                        | 1,961       |
| Variant identified in exome<br>of genome sequencing study                             | 6,495                        | 1,948       |

**Table S1. Filtering of de novo mutations used in study.** Overview of filters that were applied to specific columns of the annotated de novo variants used in the analysis (left column). The middle and right columns indicate the number of variants left after the filtering for the ID and DD set and control set respectively.

| <b>Study</b>                          | <b>Trios</b> | <b>Disorder</b> | <b>Coding</b> | <b>Missense</b> | <b>LoF</b> |
|---------------------------------------|--------------|-----------------|---------------|-----------------|------------|
| McRae <i>et al.</i> <sup>3</sup>      | 4,293        | DD              | 5,375         | 3,375           | 961        |
| Lelieveld <i>et al.</i> <sup>4a</sup> | 820          | ID              | 948           | 579             | 177        |
| de Ligt <i>et al.</i> <sup>5</sup>    | 100          | ID              | 56            | 35              | 10         |
| Rauch <i>et al.</i> <sup>6</sup>      | 51           | ID              | 90            | 54              | 31         |
| Halvardson <i>et al.</i> <sup>7</sup> | 38           | ID/EE           | 26            | 18              | 4          |
| Total                                 | 5,302        |                 | 6,495         | 4,061           | 1,183      |

**Table S2. Dataset composition of intellectual disability and developmental disorders cohort (ID + DD).** Columns indicate (from left to right), the study reference, number of trios included from the study, the disorder that was studied (DD= Developmental disorders, ID = Intellectual disability and EE = Epileptic Encephalopathies), and the number of coding, missense and loss-of-function de novo mutations after filtering. <sup>a</sup>Including 100 de novo mutations (median GATK quality score of 241) not included in the original publication.

| Study                                    | Trios | Disorder    | Coding | Missense | LoF |
|------------------------------------------|-------|-------------|--------|----------|-----|
| Iossifov <i>et al.</i> <sup>8</sup>      | 1,786 | Sibs. (ASD) | 1,267  | 805      | 139 |
| Krumm <i>et al.</i> <sup>9a</sup>        |       |             | 323    | 220      | 30  |
| GONL <sup>10</sup>                       | 250   | Control     | 102    | 67       | 5   |
| Turner <i>et al.</i> <sup>11</sup>       | 43    | Sibs. (ASD) | 28     | 18       | 1   |
| Gulsuner <i>et al.</i> <sup>12</sup>     | 84    | Sibs. (SCZ) | 50     | 28       | 9   |
| Besenbacher <i>et al.</i> <sup>13b</sup> | 283   | Control     | 178    | 135      | 15  |
| Total                                    | 2,448 |             | 1,948  | 1,273    | 199 |

**Table S3. Dataset composition of cohort of healthy controls (Control).**

Columns (from left to right) indicate the reference to the studies, number of trios that were included from the study, the disorder that was studied (Sibs. = siblings, ASD = Autism spectrum disorder and SCZ = Schizophrenia), the number of coding, missense and loss-of-function de novo mutations that were included from the study. <sup>a</sup>The study by Krumm *et al.*<sup>9</sup> performed a re-analysis on existing data of Iossifov *et al.*<sup>8</sup> <sup>b</sup>Variants in the study of Besenbacher *et al.*<sup>13</sup> are annotated to reference genome HG18. We used LiftOver to convert the HG18 coordinates to HG19 coordinates (See .web resources).

| <b>Gene name</b> | <b>Gene ID</b>    | <b>Miss. DNMs</b> | <b>Avg. distance</b> | <b>p-value</b> | <b>Adj. p-value</b> |
|------------------|-------------------|-------------------|----------------------|----------------|---------------------|
| <i>SYNE1</i>     | ENST00000367255.5 | 2                 | 36                   | 0.0027         | 1                   |
| <i>TMPRSS15</i>  | ENST00000284885.3 | 2                 | 9                    | 0.0061         | 1                   |
| <i>MAPK8</i>     | ENST00000374189.1 | 2                 | 6                    | 0.0101         | 1                   |
| <i>FAT4</i>      | ENST00000394329.3 | 2                 | 86                   | 0.0116         | 1                   |
| <i>SPOCK3</i>    | ENST00000357154.3 | 2                 | 14                   | 0.0220         | 1                   |
| <i>PRPS2</i>     | ENST00000398491.2 | 2                 | 15                   | 0.0299         | 1                   |

**Table S4. Results from clustering analysis on the control cohort.** Columns from left to right indicate the gene name, used GENCODE gene identifier, number of de novo missense variants, average distance between de novo variants, permutations test based p-value and Bonferroni corrected p-value. None of the genes reach statistical significance after multiple testing correction.

**Table S5. List of known genes involved in intellectual disability and developmental disorders**

External file: [table\\_S5\\_known\\_DD\\_genes.xls](#)

**Table S6. List of identified clustering mutations**

External file: [table\\_S6\\_dnm\\_clustering\\_genes.xls](#)



|                   | Genes with sig. cluster | Other genes | <b>total</b> |
|-------------------|-------------------------|-------------|--------------|
| Known ID/DD genes | 12                      | 187         | 199          |
| Other genes       | 3                       | 381         | 384          |
| <b>total</b>      | 15                      | 568         | 583          |

**Table S7A. Enrichment of genes have previously been implicated in ID/DD.**

Data used to calculate statistical enrichment of genes associated to ID/DD based on the associated ID/DD genes on the combined list of the DDG2P and RUMC. The dataset contained in total 583 genes that were recurrently mutated of which 15 genes contained clustering de novo variants. 13 of the 15 genes were associated to ID/DD. Enrichment was tested with a two-sided Fisher's Exact test and yielded a significant p-value of 3.09E-04.

|                   | Genes with sig. cluster | Other genes | <b>total</b> |
|-------------------|-------------------------|-------------|--------------|
| Known ID/DD genes | 11                      | 162         | 173          |
| Other genes       | 4                       | 406         | 410          |
| <b>total</b>      | 15                      | 568         | 583          |

**Table S7B. Enrichment of genes have previously been implicated in ID/DD solely on RUMC diagnostic list.**

Data used to calculate statistical enrichment of genes associated to ID/DD based on the associated ID/DD genes solely on the RUMC list (see web resources). Enrichment was tested with a two-sided Fisher's Exact test and yielded a significant p-value of 5.13E-04.

|                   | Genes with sig. cluster | Other genes | <b>total</b> |
|-------------------|-------------------------|-------------|--------------|
| Known ID/DD genes | 8                       | 153         | 161          |
| Other genes       | 7                       | 415         | 422          |
| <b>total</b>      | 15                      | 568         | 583          |

**Table S7C. Enrichment of genes have previously been implicated in ID/DD excluding two large DDD exome studies.**

To completely remove the weight of the DDD exomes we have extended the enrichment test by excluding a set of genes based on the following criteria:

1. Novel genes enriched for de novo mutations found in the two large scale exome data studies of the DDD<sup>3; 14</sup>
2. Complement to the genes found enriched for de novo variants in Lelieveld *et al.*<sup>4</sup>

Analysis via a two-sided Fisher's Exact test yielded a significant P-value of 3.68E-

02

| Gene name       | De novo missense | p-value  | Adj. p-value |
|-----------------|------------------|----------|--------------|
| <i>ACTL6B</i>   | 3                | 8.48E-04 | 1            |
| <i>ALG13</i>    | 3                | 3.66E-03 | 1            |
| <i>CDK13</i>    | 12               | 4.34E-14 | 7.93E-10     |
| <i>COL4A3BP</i> | 6                | 1.28E-07 | 2.33E-03     |
| <i>GABBR2</i>   | 3                | 6.82E-03 | 1            |
| <i>GRIN2B</i>   | 11               | 4.22E-11 | 7.71E-07     |
| <i>KCNH1</i>    | 7                | 1.36E-07 | 2.49E-03     |
| <i>KCNQ2</i>    | 20               | 3.60E-28 | 6.59E-24     |
| <i>KIF5C</i>    | 3                | 3.22E-03 | 1            |
| <i>PACS1</i>    | 9                | 1.95E-10 | 3.57E-06     |
| <i>PACS2</i>    | 3                | 5.88E-03 | 1            |
| <i>PCGF2</i>    | 3                | 2.99E-04 | 1            |
| <i>PPP2R1A</i>  | 4                | 9.88E-05 | 1            |
| <i>PPP2R5D</i>  | 16               | 2.89E-24 | 5.28E-20     |
| <i>SMAD4</i>    | 4                | 4.40E-05 | 8.04E-01     |

**Table S8. Statistical significance of enrichment for de novo mutations for all identified genes.** P-values are calculated based on Gene Specific Mutation Rates from Samocha *et al.*<sup>15</sup> and corrected for multiple testing by the Bonferroni correction (for 19,280 genes). Only some of the previously known genes reached statistical significance. Genes identified by our clustering analysis would not have been identified as candidate genes based on a statistical approach for the enrichment of de novo mutations.

**Table S9. Known functions of identified genes**

External file: [table\\_S9\\_known\\_function\\_of\\_identified\\_genes.xlsx](#)

**Table S10: Overview of de novo variants found per individual**

External file: [table\\_S10\\_overview\\_all\\_DNM\\_per\\_sample\\_clustering\\_genes.xlsx](#)

**Table S11. Overview of literature supporting a NHI mechanism**

External file: [table\\_S11\\_overview\\_literature\\_study\\_known\\_NHI\\_genes.xlsx](#)

**Table S12. List of non-haploinsufficient genes involved in intellectual disability and developmental disorders**

External file: [table\\_S12\\_List\\_of\\_NHI\\_genes\\_involved\\_in\\_id\\_dd.xlsx](#)

**Table S13. List of haploinsufficient genes involved in intellectual disability and developmental disorders**

External file: [table\\_S13\\_List\\_of\\_HI\\_genes\\_involved\\_in\\_id\\_dd.xlsx](#)



| <b>Gene name</b>          | <b>Allelic requirement</b> | <b>mutation consequence</b>              |
|---------------------------|----------------------------|------------------------------------------|
| <i>ALG13<sup>a</sup></i>  | x-linked dominant          | all missense/in frame                    |
| <i>CDK13</i>              | monoallelic                | all missense/in frame                    |
| <i>COL4A3BP</i>           | monoallelic                | activating                               |
| <i>GRIN2B<sup>a</sup></i> | monoallelic                | loss of function / all missense/in frame |
| <i>KCNH1</i>              | monoallelic                | activating                               |
| <i>KCNQ2</i>              | monoallelic                | loss of function                         |
| <i>KIF5C</i>              | monoallelic                | all missense/in frame                    |
| <i>PACS1</i>              | monoallelic                | activating                               |
| <i>PCGF2</i>              | monoallelic                | activating                               |
| <i>PPP2R1A</i>            | monoallelic                | dominant negative                        |
| <i>PPP2R5D</i>            | monoallelic                | dominant negative                        |
| <i>SMAD4<sup>a</sup></i>  | monoallelic                | loss of function / all missense/in frame |

**Table S14. Identified known genes and their mutational consequence.**

Allelic requirement and mutational consequence according to DDG2P. <sup>a</sup>In the statistical analysis we excluded genes for reasons mentioned in the main text .

|                                | Hi genes | NHI genes | Total |
|--------------------------------|----------|-----------|-------|
| Genes with significant cluster | 1        | 8         | 9     |
| Other genes                    | 182      | 108       | 290   |
| Total                          | 183      | 116       | 299   |

**Table S15. Enrichment of genes based on their mutational consequence.**

Statistical enrichment testing of disease mechanisms of the genes identified in this study. Of the 15 identified genes, 9 are annotated with a disease mechanism after filtering based on the DDG2P and RUMC lists. Analysis via Fisher's Exact test yielded a significant P-value of 2.66E-03.

**Table S16. Tolerance scores based on dn/ds ratios for all human genes**

External file: [table\\_S16\\_Dn\\_ds\\_ratios\\_for\\_all\\_human\\_genes.xls](#)

**Table S17. HI and NHI DNMs analysed to protein structures**

External file: [table\\_S17\\_DNMs\\_in\\_protein\\_structures.xlsx](#)

## Supplemental web resources

DDG2P: <https://www.ebi.ac.uk/gene2phenotype/downloads>

RUMC Genome diagnostics gene list:

<https://www2.radboudumc.nl/Informatievoorverwijzers/Genoomdiagnostiek/en/Pages/Intellectualdisability.aspx>

Lift Over tool: <https://genome.ucsc.edu/cgi-bin/hgLiftOver>

## Supplemental References

1. Finn, R.D., Coghill, P., Eberhardt, R.Y., Eddy, S.R., Mistry, J., Mitchell, A.L., Potter, S.C., Punta, M., Qureshi, M., Sangrador-Vegas, A., et al. (2016). The Pfam protein families database: towards a more sustainable future. *Nucleic Acids Res* 44, D279-285.
2. Turner, T.N., Yi, Q., Krumm, N., Huddleston, J., Hoekzema, K., HA, F.S., Doebley, A.L., Bernier, R.A., Nickerson, D.A., and Eichler, E.E. (2017). denovo-db: a compendium of human de novo variants. *Nucleic Acids Res* 45, D804-D811.
3. Deciphering Developmental Disorders Study. (2017). Prevalence and architecture of de novo mutations in developmental disorders. *Nature*.
4. Lelieveld, S.H., Reijnders, M.R., Pfundt, R., Yntema, H.G., Kamsteeg, E.J., de Vries, P., de Vries, B.B., Willemsen, M.H., Kleefstra, T., Lohner, K., et al. (2016). Meta-analysis of 2,104 trios provides support for 10 new genes for intellectual disability. *Nature neuroscience* 19, 1194-1196.
5. de Ligt, J., Willemsen, M.H., van Bon, B.W., Kleefstra, T., Yntema, H.G., Kroes, T., Vulto-van Silfhout, A.T., Koolen, D.A., de Vries, P., Gilissen, C., et al. (2012). Diagnostic exome sequencing in persons with severe intellectual disability. *The New England journal of medicine* 367, 1921-1929.
6. Rauch, A., Wieczorek, D., Graf, E., Wieland, T., Ende, S., Schwarzmayr, T., Albrecht, B., Bartholdi, D., Beygo, J., Di Donato, N., et al. (2012). Range of genetic mutations associated with severe non-syndromic sporadic intellectual disability: an exome sequencing study. *Lancet* 380, 1674-1682.
7. Halvardson, J., Zhao, J.J., Zaghlool, A., Wentzel, C., Georgii-Hemming, P., Mansson, E., Ederth Savmarker, H., Brandberg, G., Soussi Zander, C., Thuresson, A.C., et al. (2016). Mutations in HECW2 are associated with intellectual disability and epilepsy. *Journal of medical genetics* 53, 697-704.
8. Iossifov, I., O'Roak, B.J., Sanders, S.J., Ronemus, M., Krumm, N., Levy, D., Stessman, H.A., Witherspoon, K.T., Vives, L., Patterson, K.E., et al. (2014).

The contribution of de novo coding mutations to autism spectrum disorder. *Nature* 515, 216-221.

9. Krumm, N., Turner, T.N., Baker, C., Vives, L., Mohajeri, K., Witherspoon, K., Raja, A., Coe, B.P., Stessman, H.A., He, Z.X., et al. (2015). Excess of rare, inherited truncating mutations in autism. *Nature genetics* 47, 582-588.
10. Genome of the Netherlands, C. (2014). Whole-genome sequence variation, population structure and demographic history of the Dutch population. *Nature genetics* 46, 818-825.
11. Turner, T.N., Hormozdiari, F., Duyzend, M.H., McClymont, S.A., Hook, P.W., Iossifov, I., Raja, A., Baker, C., Hoekzema, K., Stessman, H.A., et al. (2016). Genome Sequencing of Autism-Affected Families Reveals Disruption of Putative Noncoding Regulatory DNA. *American journal of human genetics* 98, 58-74.
12. Gulsuner, S., Walsh, T., Watts, A.C., Lee, M.K., Thornton, A.M., Casadei, S., Rippey, C., Shahin, H., Consortium on the Genetics of, S., Group, P.S., et al. (2013). Spatial and temporal mapping of de novo mutations in schizophrenia to a fetal prefrontal cortical network. *Cell* 154, 518-529.
13. Besenbacher, S., Sulem, P., Helgason, A., Helgason, H., Kristjansson, H., Jonasdottir, A., Jonasdottir, A., Magnusson, O.T., Thorsteinsdottir, U., Masson, G., et al. (2016). Multi-nucleotide de novo Mutations in Humans. *PLoS genetics* 12, e1006315.
14. Deciphering Developmental Disorders Study. (2015). Large-scale discovery of novel genetic causes of developmental disorders. *Nature* 519, 223-228.
15. Samocha, K.E., Robinson, E.B., Sanders, S.J., Stevens, C., Sabo, A., McGrath, L.M., Kosmicki, J.A., Rehnstrom, K., Mallick, S., Kirby, A., et al. (2014). A framework for the interpretation of de novo mutation in human disease. *Nature genetics* 46, 944-950.
